# Supplementary material
Source: Frontiers journal article supplement (https://www.frontiersin.org/articles/308862)
Supplement: Presentation_1.pdf [file Presentation_1.pdf]

## *Supplementary Material*

### **No vegetative and fecundity fitness cost associated with acetyl-coenzyme A carboxylase non-target-site resistance in a black-grass (*Alopecurus myosuroides* Huds) population**

Eshagh Keshtkar<sup>1, 2\*</sup>, Solvejg K. Mathiassen<sup>1</sup>, Per Kudsk<sup>1</sup>

<sup>1</sup>Department of Agroecology, Faculty of Science and Technology, Aarhus University, Slagelse, Denmark

<sup>2</sup>Department of Agronomy, Faculty of Agriculture, Tarbiat Modares University, Tehran, Iran

\* **Correspondence:** Eshagh Keshtkar, [keshtkar@modares.ac.ir](mailto:keshtkar@modares.ac.ir)

## Supplementary Figures

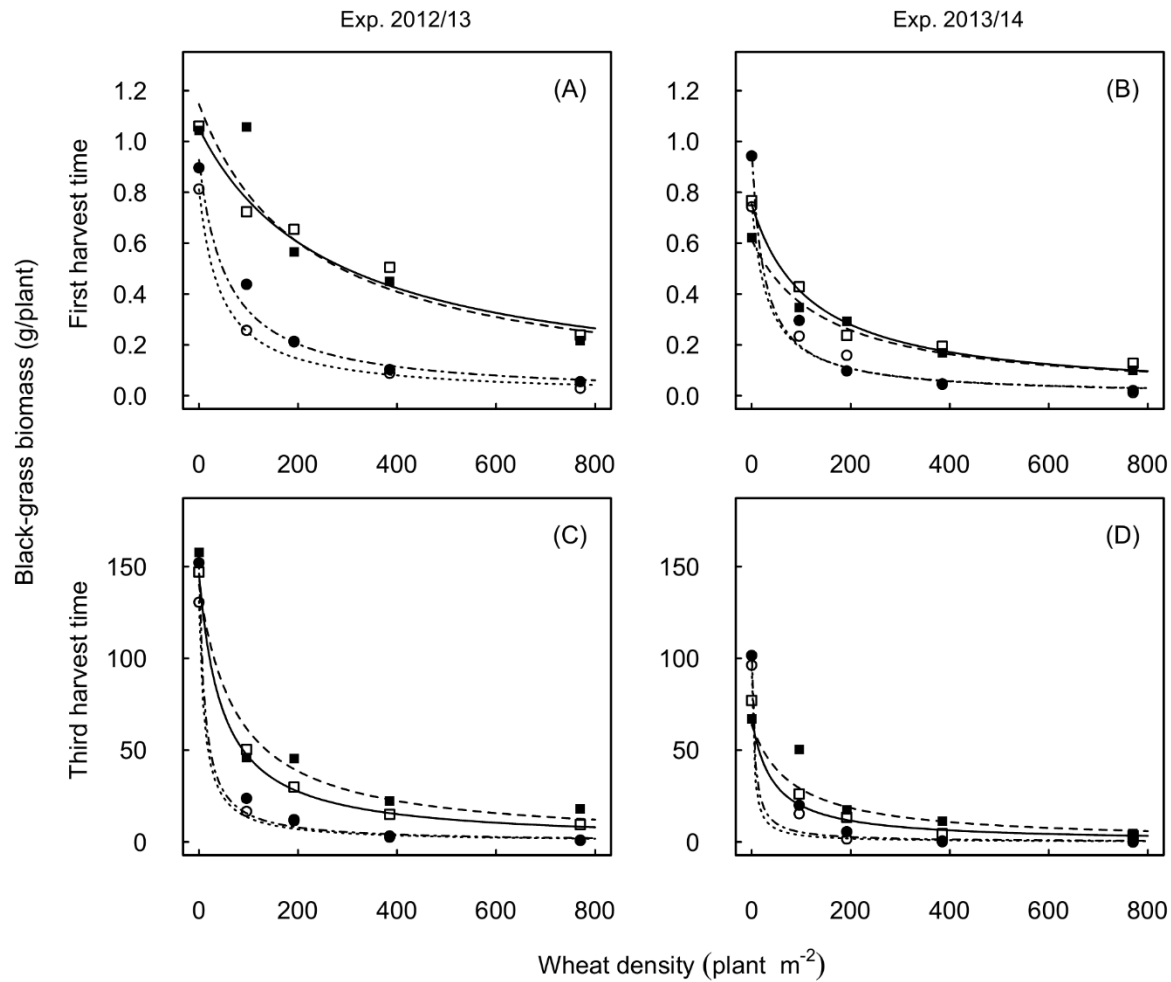

**Figure S1** Biomass production of herbicide-susceptible (S, open markers) and resistant (R, closed markers) black-grass sub-populations in response to increasing density and two different growth stages of winter wheat (2-leaf stage (GS-I); squares and 3-4 leaf stage (GS-II); circles) in glasshouse experiments 2012/13 (A and C) and 2013/14 (B and D). Data of first harvest time (A and B) and third harvest time (C and D) are presented. Estimated parameters are presented in Tables 1 (Experiment 2012/13) and 2 (Experiment 2013/14). The S and R sub-populations were selected within a NTSR population using a plant cloning technique.

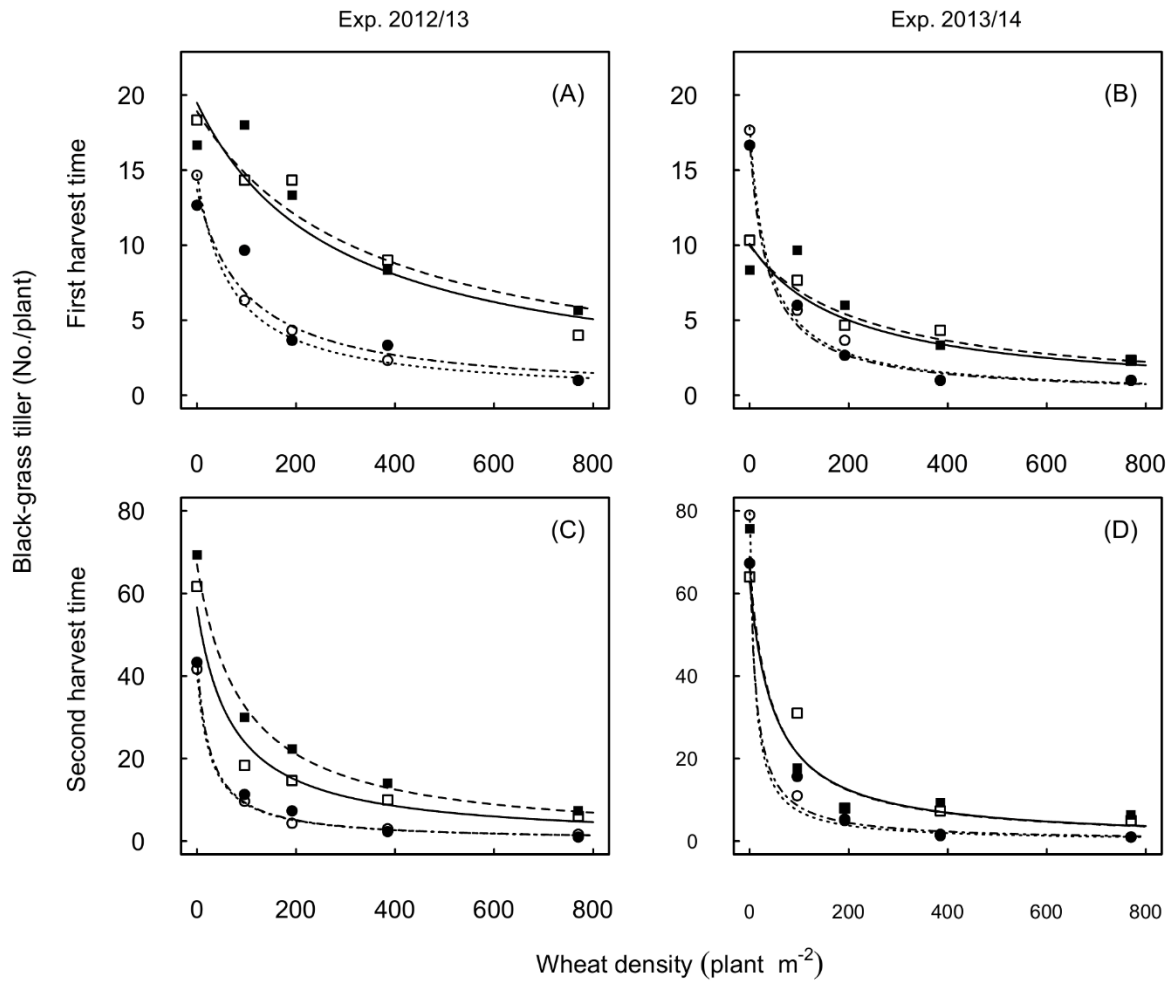

**Figure S2** Tiller production of herbicide-susceptible (S, open markers) and resistant (R, closed markers) black-grass sub-populations in response to increasing density and two different growth stages of winter wheat (2-leaf stage (GS-I); squares and 3-4 leaf stage (GS-II); circles) in glasshouse experiments 2012/13 (A and C) and 2013/14 (B and D). Data of first harvest time (A and B) and second harvest time (C and D) are presented. Estimated parameters are presented in Tables 1 (Experiment 2012/13) and 2 (Experiment 2013/14). The S and R sub-populations were selected within a NTSR population using a plant cloning technique.

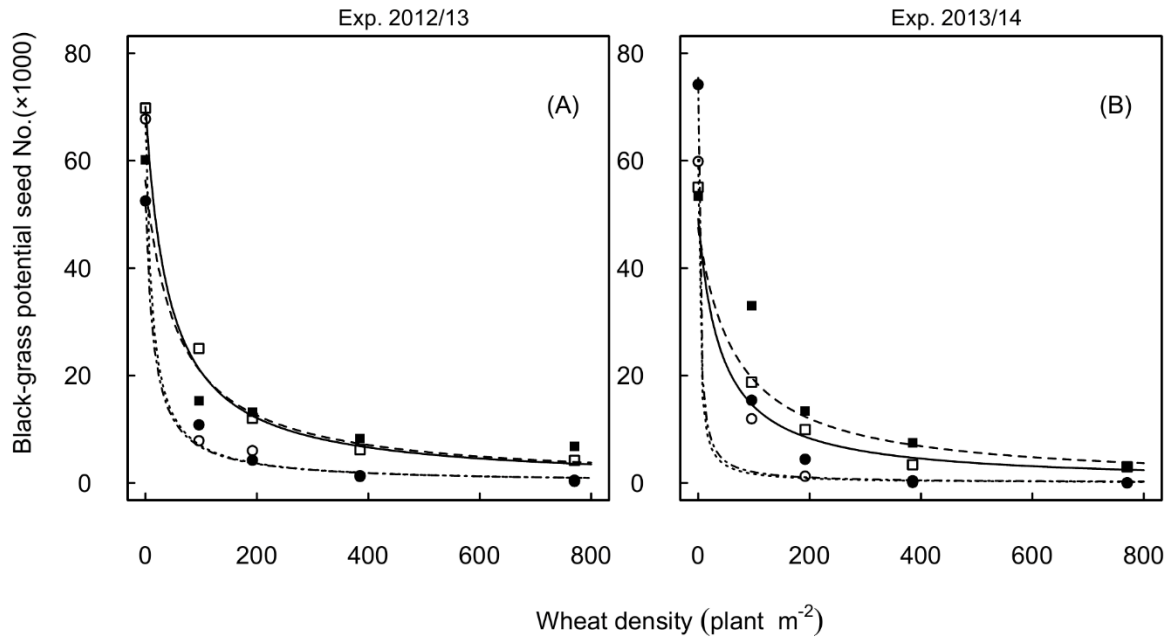

**Figure S3** Potential seed production of herbicide-susceptible (S, open markers) and resistant (R, closed markers) black-grass sub-populations in response to increasing density and two different growth stages of winter wheat (2-leaf stage (GS-I); squares and 3-4 leaf stage (GS-II); circles) in glasshouse experiments 2012/13 (A) and 2013/14 (B). Estimated parameters are presented in Tables 1 (Experiment 2012/13) and 2 (Experiment 2013/14). The S and R sub-populations were selected within a NTSR population using a plant cloning technique.

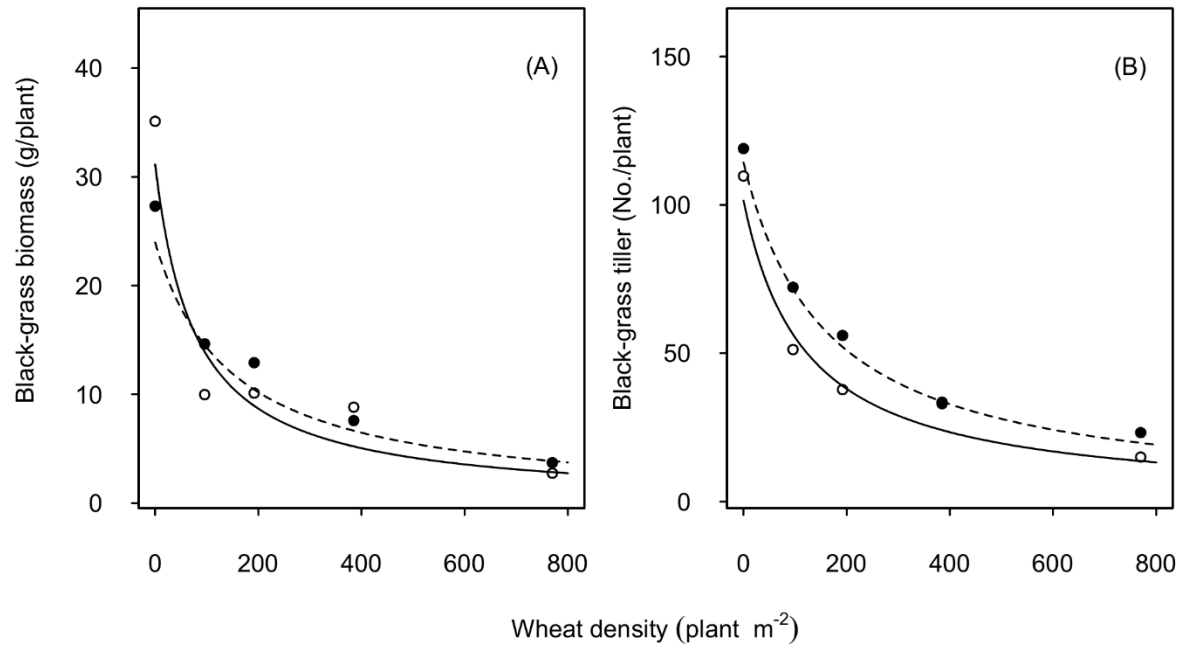

**Figure S4** Biomass (A) and tiller (B) production of herbicide-susceptible (S, open markers) and resistant (R, closed markers) black-grass sub-populations in response to increasing density of winter wheat in field experiment. Estimated parameters are presented in Table 3. The S and R sub-populations were selected within a NTSR population using a plant cloning technique.
